# Supplementary material
Source: PubMed Central journal article supplement (PMC3497761)
Supplement: 1208517109_pnas.201208517SI.pdf [file 1208517109_pnas.201208517SI.pdf]

# Supporting Information

Yang et al. 10.1073/pnas.1208517109

## SI Materials and Methods

**Preparation of Domain I of Spindlin1 for ITC Measurements.** An isolated tudor-like domain I of Spindlin1 (aa 27–120) was expressed in *Escherichia coli* using a pET28a-SUMO vector. The N-terminal His-SUMO tagged fusion protein was first purified with Ni-NTA chelating resins, followed by cleavage of the His-SUMO tag with the SUMO protease during dialysis. The cleaved tag was separated from the domain I protein through Ni-NTA resins, and the domain I protein was further purified using a HiLoad-16/60 Superdex-75 column (GE Healthcare). ITC experiments were carried out following a previously described procedure (1).

**Mononucleosome Pull-Down, Analytic Ultracentrifugation, and Size Exclusion Column Chromatography Analyses.** Chemical mimetics of histone H3 and H4 methylated at various lysine residues were prepared according to a published protocol (2), and the chemically

modified histone H3 or H4 was assembled into mononucleosomes with other core histones and biotin-labeled 601 nucleosome positioning sequence (3). Pull-down experiments with the modified mononucleosomes were carried out following the procedures we previously described (1).

Analytic ultracentrifugation experiments were performed on a Beckman Proteomelab XL-1 machine at  $262,000 \times g$  (corresponding to 60,000 rpm) for 4 h. Size exclusion chromatography was performed on a Superdex 75 10/300 GL column (GE Healthcare). Both experiments were carried out at 4 °C under the condition of 50 mM Hepes at pH 8.0 and 500 mM NaCl. The concentration of Spindlin1 is at 1 mg/mL, and the H3K4me3 peptide (aa 1–8) was added to 1:1 molar ratio in the protein–peptide complex sample. The protein–peptide complex formation at this salt concentration was assessed by ITC measurements.

1. Wang W, et al. (2011) Nucleolar protein Spindlin1 recognizes H3K4 methylation and stimulates the expression of rRNA genes. *EMBO Rep* 12(11):1160–1166.
2. Simon MD, et al. (2007) The site-specific installation of methyl-lysine analogs into recombinant histones. *Cell* 128(5):1003–1012.

3. Lowary PT, Widom J (1998) New DNA sequence rules for high affinity binding to histone octamer and sequence-directed nucleosome positioning. *J Mol Biol* 276(1): 19–42.

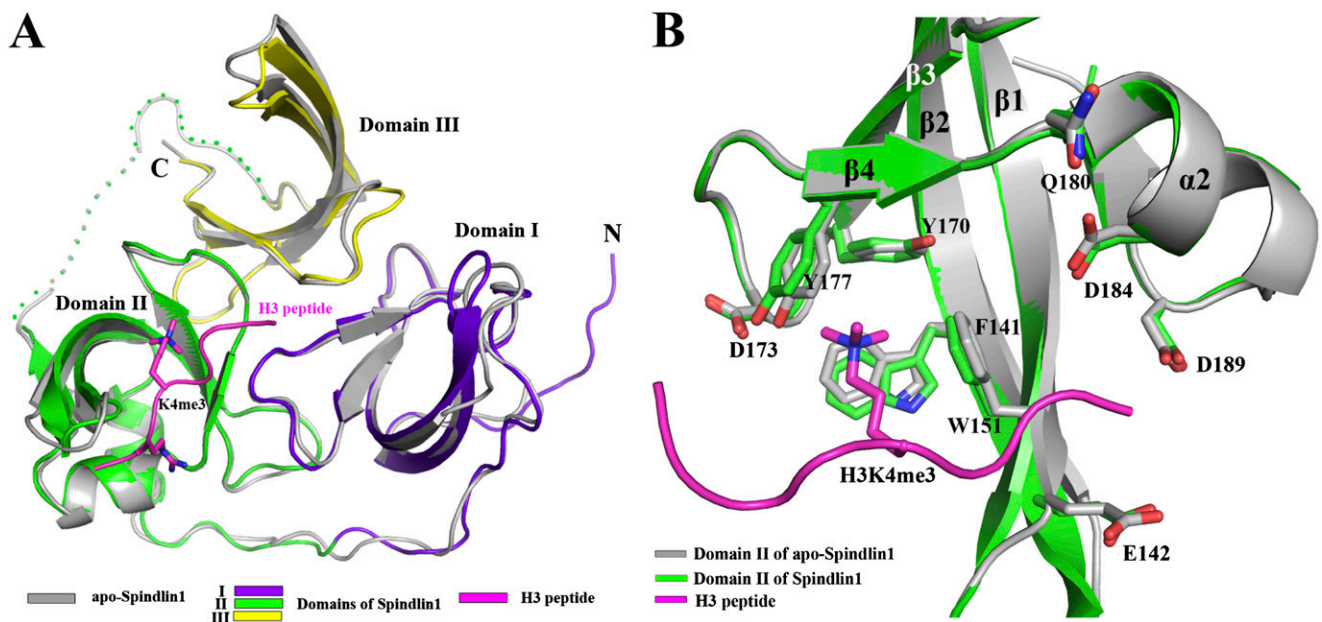

**Fig. S1.** Comparison of apo and H3K4me3 peptide-bound structures of Spindlin1. (A) Superposition of the apo and the peptide-bound structures of Spindlin1. The apo structure is colored gray, and the peptide-bound structure is colored the same as in Fig. 1. (B) Domain II residues involved in binding the histone H3 peptide, including those forming the methyllysine-binding aromatic cage, show no significant conformational differences between the peptide-bound (green) and the apo (gray) structures.





**Table S1. Statistics for crystallographic analysis**

| Data collection               | Spindlin1 + H3K4me3 peptide      |
|-------------------------------|----------------------------------|
| Wave length (Å)               | 0.9789                           |
| Space group                   | P2 <sub>1</sub> 2 <sub>1</sub> 2 |
| Unit cell (Å)                 | a = 122.43, b = 42.69, c = 50.31 |
| Resolution (Å)                | 50–2.10 (2.18–2.10)              |
| Rmerge                        | 0.077 (0.387)                    |
| I/σI                          | 24.3 (6.6)                       |
| Completeness (%)              | 99.9 (100)                       |
| Total/Unique reflections      | 126368/16119                     |
| Refinement Statistics         |                                  |
| R-work/R-free (%)             | 18.1 (21.8)                      |
| Rmsd bonds (Å)                | 0.007                            |
| Rmsd angles (°)               | 1.064                            |
| B factor (overall)            | 52.9 Å <sup>2</sup>              |
| Spindlin1 (overall)           | 52.7 Å <sup>2</sup>              |
| Main chain                    | 49.9 Å <sup>2</sup>              |
| Sidechain                     | 55.5 Å <sup>2</sup>              |
| Peptide (overall)             | 52.2 Å <sup>2</sup>              |
| Mainchain                     | 55.6 Å <sup>2</sup>              |
| Sidechain                     | 49.2 Å <sup>2</sup>              |
| Water                         | 51.8 Å <sup>2</sup>              |
| SO <sub>4</sub> <sup>2-</sup> | 74.0 Å <sup>2</sup>              |
| Glycerol                      | 57.1 Å <sup>2</sup>              |
| CHES                          | 53.7 Å <sup>2</sup>              |
| Ramachandran plots            |                                  |
| Favored                       | 194 (98.0%)                      |
| Allowed                       | 4 (2.0%)                         |
| Outlier                       | 0 (0%)                           |

Data collection and refinement numbers in parentheses are that for the highest resolution shell. Rmerge is defined as  $\frac{\sum |I - \langle I \rangle|}{\sum \langle I \rangle}$ , where I and  $\langle I \rangle$  are the averaged intensity of multiple measurements of the same reflection. The summation is over all of the observed reflections. R-factors are defined as  $\frac{\sum ||F_O| - |F_C||}{\sum |F_O|}$ , where F<sub>O</sub> denotes the observed structure factor amplitude and F<sub>C</sub> denotes the structure factor calculated from the model. R-work was calculated using the diffraction data used throughout the refinement, and R-free was calculated using the 10% of the data set aside during refinement. Rmsd, root-mean-square deviation.
